# Supplementary material
Source: ML conference proceedings conference paper supplement (https://proceedings.neurips.cc/paper_files/paper/2023/hash/5acf5a0ee5c17d372bfe7fdaeffd6e33-Abstract.html)
Supplement: Supplementary file 1 [file 5acf5a0ee5c17d372bfe7fdaeffd6e33-Supplemental-Conference.pdf]

## 482 A Details on GCL Methods, Benchmarks and Experiment Settings

### 483 A.1 Brief Introduction of GCL methods

#### 484 Methods for the node classification task.

- 485 • **GRACE** [61]. GRACE generates two graph views by corruption and learns node represen-  
486 tations by maximizing the agreement of node representations in these two views. To provide  
487 diverse node contexts for the contrastive objective, GRACE proposes a hybrid scheme for  
488 generating graph views on both structure and attribute levels.
- 489 • **GCA** [63]. GCA proposes adaptive augmentation that incorporates various priors for topo-  
490 logical and semantic aspects of the graph. On the topology level, GCA designs augmentation  
491 schemes based on node centrality measures, while on the node attribute level, GCA corrupts  
492 node features by adding more noise to unimportant node features.
- 493 • **ProGCL** [49]. ProGCL observes limited benefits when adopting existing hard negative  
494 mining techniques of other domains in graph contrastive learning. ProGCL proposes an  
495 effective method to estimate the probability of a negative being true one, and devises two  
496 schemes to boost the performance of GCL.
- 497 • **DGI** [45]. DGI relies on maximizing mutual information between patch representations  
498 and corresponding high-level summaries of graphs—both derived using established graph  
499 convolutional network architectures. The learnt patch representations summarize subgraphs  
500 centered around nodes of interest, and can thus be reused for downstream node-wise learning  
501 tasks.
- 502 • **MVGRL** [13]. MVGRL introduces a self-supervised approach for learning node and  
503 graph level representations by contrasting structural views of graphs. MVGRL shows that  
504 unlike visual representation learning, increasing the number of views to more than two or  
505 contrasting multi-scale encodings does not improve performance, and the best performance  
506 is achieved by contrasting encodings from first-order neighbors and graph diffusion.

#### 507 Methods for the graph classification task.

- 508 • **GraphCL** [53]. GraphCL designs four types of graph augmentations to incorporate various  
509 priors, and learns graph-level representations by maximizing the global representations of  
510 two views for a graph.
- 511 • **ADGCL** [41]. ADGCL proposes a novel principle, adversarial GCL, which enables GNNs  
512 to avoid capturing redundant information during training by optimizing adversarial graph  
513 augmentation strategies used in GCL.
- 514 • **JOAO** [54]. JOAO proposes a unified bi-level optimization framework to automatically,  
515 adaptively and dynamically select data augmentations when performing GraphCL on specific  
516 graph data. JOAO is instantiated as min-max optimization.
- 517 • **InfoGraph** [38]. InfoGraph maximizes the mutual information between the graph-level  
518 representation and the representations of substructures of different scales (*e.g.*, nodes, edges,  
519 triangles). By doing so, the graph-level representations encode aspects of the data that are  
520 shared across different scales of substructures.

### 521 A.2 Introduction of Graph Benchmarks

522 **Node classification benchmarks.** 1) Citation Networks [34, 29]. Cora, CiteSeer and PubMed are  
523 three popular citation graph datasets. In these graphs, nodes represent papers and edges correspond  
524 to the citation relationship between two papers. Nodes are classified according to academic topics.  
525 2) Amazon Co-purchase Networks [35]. Photo and Computers are collected by crawling Amazon  
526 websites. Goods are represented as nodes and the co-purchase relationships are denoted as edges.  
527 Node features are the bag-of-words representation of product reviews. Each node is labeled with the  
528 category of goods. 3) Wikipedia Networks [33]. Squirrel and Chameleon was collected from the  
529 English Wikipedia, representing page-page networks on specific topics. Nodes represent articles and  
530 edges are mutual links between them.

531 **Graph Classification benchmarks.** 1) Molecules. MUTAG [7] is a dataset of nitroaromatic  
532 compounds and the goal is to predict their mutagenicity on *Salmonella typhimurium*. PTC-MR [16] is

533 a collection of 344 chemical compounds represented as graphs that report carcinogenicity for male or  
 534 female rats. 2) Bioinformatics. PROTEINS [3] is a dataset of proteins that are classified as enzymes  
 535 or non-enzymes. Nodes represent the amino acids and two nodes are connected by an edge if they are  
 536 less than 6 Angstroms apart. 3) Social Networks. IMDB-BINARY and IMDB-MULTI [51] are movie  
 537 collaboration datasets consisting of a network of 1,000 actors/actresses who played roles in movies in  
 538 IMDB. In each graph, nodes represent actors/actresses, and corresponding nodes are connected if  
 539 they appear in the same movie. REDDIT-BINARY [51] consists of graphs corresponding to online  
 540 discussions on Reddit. In each graph, nodes represent users, and there is an edge between them if at  
 541 least one of them responds to the other’s comment.

542 Statistics of datasets are shown in Table 8.

Table 8: Statistics of classification benchmarks. We report average numbers of nodes, edges, and features across graphs in graph classification datasets. For datasets lacking feature attributes, we use all-one vectors as pseudo attributes in practice.

| Task     | Category        | Dataset       | #Graphs | # Nodes | # Edges | # Features | # Classes |
|----------|-----------------|---------------|---------|---------|---------|------------|-----------|
| Node     | Citation        | Cora          | 1       | 2,708   | 5,278   | 1,433      | 7         |
|          |                 | CiteSeer      | 1       | 3,327   | 4,552   | 3,703      | 6         |
|          |                 | PubMed        | 1       | 19,717  | 44,338  | 500        | 3         |
|          | Co-purchase     | Photo         | 1       | 7,650   | 119,081 | 745        | 8         |
|          |                 | Computers     | 1       | 13,752  | 245,861 | 767        | 10        |
|          | Wikipedia       | Chameleon     | 1       | 2,277   | 36,101  | 500        | 6         |
| Squirrel |                 | 1             | 5,201   | 217,073 | 2,089   | 4          |           |
| Graph    | Protein         | MUTAG         | 188     | 17.9    | 39.6    | 7          | 2         |
|          |                 | PTC-MR        | 344     | 14.3    | 29.4    | 18         | 2         |
|          | Bioinformatics  | PROTEINS      | 1113    | 39.1    | 145.6   | 0          | 2         |
|          | Social Networks | IMDB-BINARY   | 1000    | 19.8    | 193.1   | 0          | 2         |
|          |                 | IMDB-MULTI    | 1500    | 13.0    | 131.9   | 0          | 3         |
|          |                 | REDDIT-BINARY | 2000    | 429.6   | 995.5   | 0          | 2         |

### 543 A.3 Experimental Details

544 For the node classification task, following Zhu et al. [61], Velickovic et al. [45], Hassani and  
 545 Khasahmadi [13], we use linear evaluation protocol, where the model is trained in an unsupervised  
 546 manner and feeds the learned representation into a linear logistic regression classifier. In the training  
 547 procedure, a 2-layer Graph Convolutional Network (GCN) [22] is adopted as the encoder. We  
 548 adopt the default settings of Zhu et al. [61]. Specifically, we use removing edges and masking  
 549 node features as data augmentations. We grid search augmentation ratios in  $\{0.0, 0.1, 0.2, 0.3, 0.4\}$ .  
 550 All experiments are trained with Adam SGD optimizer [21] with the learning rate selected from  
 551  $\{0.01, 0.001, 0.0005\}$ . The epoch number is selected from  $\{200, 1000, 2000\}$ . The other parameters  
 552 are fixed for all datasets. In the evaluation procedure, we randomly split each dataset with a training  
 553 ratio of 0.8 and a test ratio of 0.1, and hyperparameters are fixed as the same for all the experiments.  
 554 Each experiment is repeated ten times with mean and standard derivation of accuracy score.

555 For the graph classification task, in the training procedure, a Graph Isomorphism Network (GIN) [50]  
 556 is adopted as the encoder whose layer number is chosen from  $\{4, 8, 12\}$  and hidden dimension chosen  
 557 from  $\{32, 512\}$ . We use Adam SGD optimizer with the learning rate selected in  $\{10^{-3}, 10^{-4}, 10^{-5}\}$   
 558 and the number of epochs in  $\{20, 100\}$ . Following Sun et al. [38], You et al. [53], we feed the gener-  
 559 ated graph embeddings into a linear Support Vector Machine (SVM) classifier, and the parameters of  
 560 the downstream classifier are independently tuned by cross-validation. The C parameter is tuned in  
 561  $\{10^{-3}, 10^{-2}, \dots, 10^2, 10^3\}$ . We report the mean 10-fold cross-validation accuracy with standard  
 562 deviation. All experiments are conducted on a single 24GB NVIDIA GeForce RTX 3090.

## 563 B Visualization of VCL and GCL via T-SNE

564 To further illustrate the difference between VCL and GCL, we visualize the representations learned  
 565 with contrastive loss and uniformity loss using T-SNE [43]. The results are shown in Figure 2. For

566 VCL, the representations learned by uniformity loss distribute more randomly without clear decision  
 567 boundaries, compared to those learned by InfoNCE loss. However, for GCL, the representations  
 568 learned by the two losses both achieve good clustering effects.

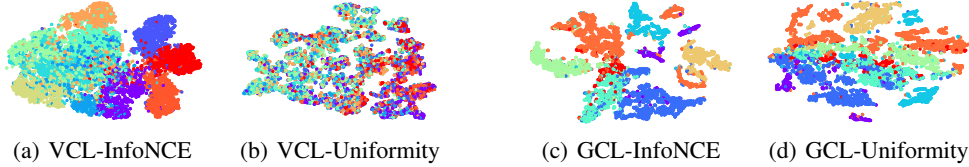

Figure 2: T-SNE visualization of representations learned by VCL and GCL, with InfoNCE loss and uniformity loss. Figure 2(a) and 2(b) are conducted with SimCLR on CIFAR10. Figure 2(c) and 2(d) are conducted with GRACE on Amazon-Photo dataset.

## 569 C Results of Extensive benchmarks

570 In our paper, we have chosen commonly estimated benchmarks (Cora, CiteSeer, PubMed, Amazon-  
 571 Computers, and Amazon Photo) following the original papers (GRACE [61], GCA [63], and so  
 572 on). Here, we also provide results and discussions about extensive benchmarks including heteophily  
 573 benchmarks and large benchmarks.

574 **Heteophily benchmarks.** We conduct experiments on two heterophilic datasets Wikipedia-  
 575 Chameleon and Wikipedia-Squirrel [33] with the GRACE method. As observed in Table 9, training  
 576 with only negative samples (NO Pos) also gains benefits compared with randomly initialized models  
 577 (NO Training). However, the gap between using uniformity loss (NO Pos) and using contrastive loss  
 578 (Contrast) is larger than that of homophilic datasets. In conclusion, the positive-free property of GCL  
 579 is more applicable to homophilic graphs. It agrees with our theoretical analysis in Section 4.2 which  
 580 assumes neighbors as positive samples.

Table 9: Test accuracy (%) on the homophily and heteophily datasets with the GRACE methods. We compare the performances of models trained the InfoNCE loss (Contrast), uniformity loss (NO Pos), alignment loss (NO Neg), and no optimization objective (NO Training). Mean accuracy with standard derivation is reported after 10 runs. Average accuracy across datasets is reported. We conduct significance testing using Wilcoxon Signed Rank Test [48], comparing the contrastive loss with other loss types. The p-value is averaged across datasets. A value below 0.05 denotes significant accuracy difference ( red ), while a value above 0.05 indicates insignificance ( green ).

|        |             | Homophily    |              |              |       |             | Heteophily   |              |       |             |
|--------|-------------|--------------|--------------|--------------|-------|-------------|--------------|--------------|-------|-------------|
|        |             | Cora         | CiteSeer     | PubMed       | Avg   | Avg p-value | Chameleon    | Squirrel     | Avg   | Avg p-value |
| GRACE  | Contrast    | 84.67 ± 1.39 | 73.47 ± 2.32 | 85.80 ± 0.16 | 81.31 | -           | 48.12 ± 2.35 | 33.63 ± 1.86 | 40.88 | -           |
|        | NO Training | 69.12 ± 4.18 | 60.60 ± 2.59 | 80.65 ± 0.80 | 70.12 | 0.0020      | 32.23 ± 1.82 | 25.34 ± 1.22 | 28.79 | 0.0020      |
|        | NO Pos      | 82.65 ± 1.18 | 73.50 ± 2.41 | 85.28 ± 0.79 | 80.48 | 0.1934      | 42.97 ± 2.11 | 30.48 ± 2.25 | 36.73 | 0.0254      |
|        | NO Neg      | 29.85 ± 1.45 | 20.42 ± 2.26 | 39.63 ± 0.81 | 29.97 | 0.0020      | 20.61 ± 2.38 | 19.58 ± 1.36 | 20.10 | 0.0020      |
| GCA    | Contrast    | 84.04 ± 1.55 | 72.63 ± 2.68 | 85.92 ± 0.69 | 80.86 | -           | 46.64 ± 2.85 | 35.24 ± 1.57 | 40.94 | -           |
|        | NO Training | 71.25 ± 2.32 | 58.50 ± 1.32 | 80.07 ± 0.47 | 69.94 | 0.0020      | 33.36 ± 2.04 | 25.76 ± 2.39 | 29.56 | 0.0020      |
|        | NO Pos      | 83.09 ± 2.03 | 70.42 ± 3.07 | 84.68 ± 0.63 | 79.40 | 0.1322      | 40.17 ± 3.93 | 28.60 ± 1.05 | 34.39 | 0.0107      |
|        | NO Neg      | 31.40 ± 3.61 | 22.16 ± 3.01 | 39.58 ± 0.83 | 31.05 | 0.0020      | 21.92 ± 4.15 | 20.19 ± 0.55 | 21.10 | 0.0020      |
| ProGCL | Contrast    | 85.42 ± 3.41 | 72.85 ± 2.99 | OOM          | 79.14 | -           | 48.38 ± 3.65 | 33.47 ± 1.93 | 40.93 | -           |
|        | NO Training | 79.41 ± 0.90 | 58.08 ± 1.27 | 83.54 ± 0.83 | 73.68 | 0.0026      | 34.21 ± 1.15 | 25.26 ± 2.24 | 29.74 | 0.0020      |
|        | NO Pos      | 86.76 ± 0.52 | 70.76 ± 1.63 | OOM          | 78.76 | 0.2266      | 46.44 ± 4.14 | 30.98 ± 4.32 | 38.71 | 0.1064      |
|        | NO Neg      | 30.15 ± 2.70 | 21.08 ± 1.45 | 21.13 ± 1.20 | 24.12 | 0.0020      | 20.09 ± 1.63 | 20.46 ± 1.57 | 20.28 | 0.0020      |

581 **Large benchmarks.** Here, we further consider a larger node classification benchmark OGB-arxiv  
 582 [18] with 169,343 nodes and 1,166,243 edges, using the GRACE method. A node-wise similarity  
 583 matrix is needed when computing the contrastive loss, but its time complexity and space usage are  
 584 intolerable for large datasets. The scalability problem is one of the reasons why larger datasets are  
 585 not reported in many original papers. To solve this problem, we randomly sample N=5000 nodes  
 586 when computing the similarity matrix, and send the resulting matrix to the objective function. For  
 587 each iteration, we repeat such sampling 5 times and use the mean loss. The random sampling strategy  
 588 is simple and straightforward, and more complicated strategies will be considered in the future.

589 As shown in Table 10, the performance only using negative samples is on par with that using  
 590 contrastive objectives. And only using positive samples on the node classification task also results in  
 591 collapse. These observations are consistent with our findings.

Table 10: Test accuracy (%) on the OGB-arxiv benchmark using GRACE method with the sampled InfoNCE loss (Contrast), uniformity loss (NO Pos), and alignment loss (NO Neg).

|           | Contrast         | NO Pos           | NO Neg           |
|-----------|------------------|------------------|------------------|
| OGB-arxiv | $65.97 \pm 0.23$ | $65.49 \pm 0.32$ | $23.88 \pm 0.46$ |

## 592 D Feature Collapse in Negative-free GCL for Node Classification

593 In Table 2, we find that the absence of negative samples in GCL leads to a significant performance  
 594 drop for the node classification task. Numerous factors may be responsible for the suboptimal  
 595 performance. Here we visualize the training process with alignment loss and InfoNCE loss to show  
 596 that feature collapse is the underlying cause.

597 Specifically, we show the tendency of loss, average similarities of node representations  $\mathbf{H} = f(\mathbf{X})$   
 598 and  $\mathbf{Z} = g(\mathbf{H})$ , and  $L_2$  norms of weight matrices in Figure 3. From Figure 3(a), we can find that  
 599 when trained with the alignment loss, the training loss steeply converges to  $-1$  (optimal for the  
 600 alignment loss) after the start of training. However, the similarities among node representations  $\mathbf{H}$   
 601 and  $\mathbf{Z}$  both unite towards one. It indicates that once the training starts, the model quickly learns  
 602 the short-cut where most node representations are identical to meet the alignment loss. We also  
 603 delineate  $L_2$  norms of the weight matrices, which consistently converge to zero during training. As  
 604 a comparison, we show the training process with InfoNCE loss in Figure 3(b). When trained with  
 605 InfoNCE loss, the average similarities of node representations are relatively low and norms of weights  
 are non-zero, showing that the collapse issue does not occur in the training process.

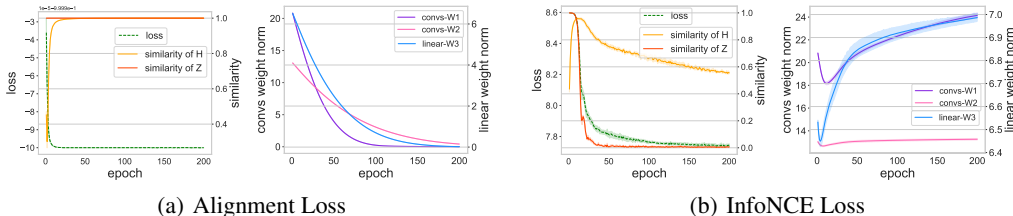

Figure 3: Tendency of loss, average similarities of node representations  $\mathbf{H}$  and  $\mathbf{Z}$ , and  $L_2$  norms of weight matrices. We choose weight matrices of the first and the second convolutional layer (Convs-W1 and Convs-W2), and the first linear layer of the projection head (Linear-W3). Experiments are conducted on Cora with GRACE.

606

## 607 E Why No-negative GCL Not Collapse in the Graph Classification

608 In Section 5, we observe different phenomena in the graph classification and node classification.  
 609 Specifically, in the graph classification task, GCL methods achieve decent performance in the  
 610 no-negative setting, while the representations collapse in the node classification task. From the  
 611 architecture perspective, we find in the graph classification task, the representations learned by the  
 612 projector tend to be identity, while the representations learned by the encoder escape from collapse.  
 613 We suspect that learning a collapsed solution is relatively easier for the global graph representation,  
 614 which can be achieved solely by the projection head.

615 Here, we provide some empirical insights into these conjectures. Instead of researching how to  
 616 make representations not collapse in the node classification, we choose to explore *when no-negative*  
 617 *GCL collapses in the graph classification*. A straightforward method is stacking more layers within  
 618 the encoder. The well-known over-smoothing issue in GNNs states that when the layer number  
 619 increases, the representations will become identical and lose expressiveness [25]. This is exactly

620 what the alignment loss needs. Taking the MUTAG dataset as an illustrated example, we indeed find  
 621 an increase in the similarities of representation  $\mathbf{H}$  and  $\mathbf{Z}$ , and a drop in the performance (Figure 4(a)).  
 622 Another choice is removing the projection head and exposing the encoder. Additionally, we increase  
 623 the learning rate, whose motivation is enforcing the encoder to iterate to the collapsed solution more  
 624 quickly. In Figure 4(b), we find that after removing the projection head, the encoder also collapses  
 625 when the learning rate is raised to 0.01. Besides the above two extreme cases, here we propose a  
 626 more convincing method. Imitating the node-wise loss in the node classification, we transform the  
 627 loss in GraphCL to an L-L version. Formally, the L-L align loss for the graph classification is:

$$\hat{\mathcal{L}}_{align} = -\frac{1}{M} \sum_{i=1}^M \frac{1}{N_i} \sum_{\mathbf{u} \in \mathcal{G}_i} s(\mathbf{u}, \mathbf{v}), \quad (11)$$

628 where  $M$  denotes the number of graphs,  $N_i$  denotes the number of nodes in the graph  $\mathcal{G}_i$ , and the  
 629 positive sample  $\mathbf{v}$  is the corresponding node of  $\mathbf{u}$  in the augmented graph. Using this alignment loss,  
 630 we train the modified GraphCL method and get a terrible test accuracy of 68.18% compared to the  
 631 original performance of 86.36%. Figure 4(c) shows that the similarities of  $\mathbf{H}$  and  $\mathbf{Z}$  both converge  
 632 close to one during training under this loss. These observations further validate our conjecture.

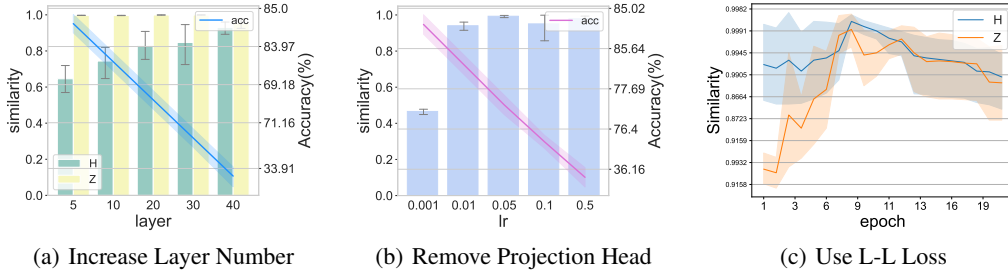

Figure 4: Experiments for the collapse of no-negative GCL in the graph classification. As the layer number of encoder increases, the similarity of representations  $\mathbf{H}$  converges close to one and the performance degrades greatly (Figure 4(a)). A similar phenomenon is observed when removing the projection head and training the encoder with a relatively high learning rate (Figure 4(b)). Additionally, by modifying the graph-level alignment loss to a local node-wise version, we also observe a collapse in the encoder (Figure 4(c)). Experiments are conducted on MUTAG with GraphCL.

## 633 F Proof of Theorems

### 634 F.1 Derivation of Theorem 4.1

635 *Proof.* It is easy to see that under the definition of the positive samples, the alignment loss can be  
 636 written equivalently as

$$\tilde{\mathcal{L}}_{align}(\mathbf{H}) = -\mathbb{E}_{x, x^+ \sim \mathcal{P}_{\mathcal{G}}(x, x^+)} [\mathbf{h}_x^\top \mathbf{h}_{x^+}] \quad (12)$$

$$= -\sum_{x, x^+} \mathcal{P}_{\mathcal{G}}(x, x^+) [\mathbf{h}_x^\top \mathbf{h}_{x^+}] \quad (13)$$

$$= -\sum_{x, x^+} [\hat{\mathbf{A}}_{x, x^+} \mathbf{h}_x^\top \mathbf{h}_{x^+}] / \sum_{x, x^+} [\hat{\mathbf{A}}_{x, x^+}] \quad (14)$$

$$= -\text{tr}(\mathbf{H} \hat{\mathbf{A}} \mathbf{H}^\top) / c, \quad (15)$$

637 where  $c = \sum_{x, x^+} [\hat{\mathbf{A}}_{x, x^+}]$  is a constant.

638 Here, to maintain the feature scale, we further consider a regularization term on the norm of node  
 639 features:

$$\hat{\mathcal{L}}_{align}(\mathbf{H}) = \tilde{\mathcal{L}}_{align}(\mathbf{H}) + \|\mathbf{H}\|^2 / c. \quad (16)$$

640 Therefore, the gradient update of the alignment objective (Eq 6) gives the following update rule of  
 641 node features  $\mathbf{H}$ :

$$\mathbf{H}_{\text{new}} = \mathbf{H} - \alpha \nabla_{\mathbf{H}} \hat{\mathcal{L}}_{\text{align}}(\mathbf{H}) \quad (17)$$

$$= \mathbf{H} - \alpha/c(-2\mathbf{A}\mathbf{H} + 2\mathbf{H}) \quad (18)$$

$$= (1 - 2\alpha/c)\mathbf{H} + 2\alpha/c \cdot \mathbf{A}\mathbf{H}, \quad (19)$$

642 where  $\alpha$  is the step size. When we choose a specific learning rate  $\alpha = c/2$ , we recover the graph  
 643 convolution operation in GCN [22]:

$$\mathbf{H}_{\text{new}} = \mathbf{A}\mathbf{H}, \quad (20)$$

644 which completes the proof.  $\square$

## 645 F.2 Derivation of Theorem 5.1

646 *Proof.* Denote  $c = \sum_{x,x'} [\hat{\mathbf{A}}_{x,x'}]$  as a constant. Calculating the gradient of the uniformity loss  
 647 w.r.t. each node feature  $\mathbf{h}_x$  gives the following rule

$$\nabla_{\mathbf{h}_x} \tilde{\mathcal{L}}_{\text{uniform}} = 2/c P_{\mathcal{G}}(x) \sum_{x'} \mathbf{A}_{x,x'} \mathbf{h}_{x'}. \quad (21)$$

648 In a matrix form, we have

$$\nabla_{\mathbf{H}} \tilde{\mathcal{L}}_{\text{uniform}} = 2/c \mathbf{D}\mathbf{A}\mathbf{H}, \quad (22)$$

649 where  $\mathbf{D}$  is the diagonal matrix containing  $\mathcal{P}(x) = \sum_{x'} \mathbf{A}_{x,x'}, \forall x \in \mathcal{V}$ .

650 Therefore, the gradient descent update of the defined uniformity loss gives

$$\mathbf{H}_{\text{new}} = \mathbf{H} - \alpha \nabla_{\mathbf{H}} \tilde{\mathcal{L}}_{\text{uniform}} = \mathbf{H} - 2/c \mathbf{D}\mathbf{A}\mathbf{H}, \quad (23)$$

651 where  $\alpha$  is the step size. It is easy to see its equivalence to the ContraNorm update.  $\square$

## 652 F.3 Derivation of Theorem 5.2

653 *Proof.* Combining Theorem 4.1 and Theorem 5.1, we can directly obtain Theorem 5.2 as a corollary.  
 654  $\square$

## 655 G Discussion on More GCL Methods

656 The contrastive mode has three mainstreams: local-to-local (L-L), global-to-global (G-G), and  
 657 global-to-local (G-L) [62]. For the local-to-local perspective, the corresponding nodes in the two  
 658 augmented views of a graph are seen as positive pairs while all the other node pairs are negative ones.  
 659 Global-to-global mode is often used when there are multiple graphs, and contrastive objects are the  
 660 global representations of augmented views. In this mode, augmented views of the same graph are  
 661 positives and all the other graph pairs are negatives. For the global-to-local perspective, positive pairs  
 662 are taken as the global representation and nodes of augmented views for the corresponding graph,  
 663 and negative pairs are the global representation and nodes of augmented views for other graphs.

664 In previous sections, we investigate the GCL methods with L-L or G-G modes, and the G-L mode on  
 665 the graph classification (like InfoGraph). In this section, we discuss two methods of the G-L mode on  
 666 node classification task: DGI [45] and MVGRL [13]. For experiments, we use the same settings as in  
 667 Section 4. As seen from Table 11, there is an obvious degeneration in accuracy when no positive  
 668 samples or negative samples are used, which is close to the no training setting. Recall that we find  
 669 the positive samples are not needed in Section 4, and the observations on DGI and MVGRL seem to  
 670 contradict our arguments. Here we attribute the inconsistency to the flaw in the methods themselves.

671 We start with an intriguing finding on DGI. Here we disorder the contrastive correspondence with a  
 672 wrong view as global representations. Specifically, we take the local representation of the graph and  
 673 its global representation as *negatives*, while local representations and global representations of the  
 674 corrupted view are seen as *positives*. Note that the corruption operation in DGI is used to generate  
 675 negative samples by shuffling rows of node attributes. See Figure 5 for illustration. We compare  
 676 the disordered version with the original DGI in Table 12, and find using a wrong view as global  
 677 representations does not affect performance. It implies that global representations lose efficacy in

678 this framework. Inspired by Zheng et al. [60], we compare the two global representations and find  
 679 they are nearly identical with every dimension being about 0.5. Extensive experiments also show the  
 680 global representation is a constant vector for inappropriate usage of the Sigmoid function in both  
 681 DGI and MVGRL [60].

682 This finding explains why the loss without positive samples does not work. Trained with such  
 683 loss, node representations are only enforced to be far away from a constant vector, which gives  
 684 no semantic guarantee. However, after adding positive samples to loss, the model learns to pull  
 685 positive samples near a constant vector, while pushing negative samples away from such vector. It  
 686 intrinsically achieves the goal of contrastive learning by gathering positives and repulsing negatives  
 687 simultaneously. Thus the model trained with both positive and negative samples can obtain satisfying  
 688 performance, explaining why DGI works with constant global representations.

Table 11: Test accuracy (%) of node classification benchmarks using DGI and MVGRL methods. We compare the performances of models trained with JSD loss (Contrast), loss part only involving negative pairs (NO Pos), loss only involving positive pairs (NO Neg), and no optimization objective (NO Training). Mean accuracy with standard derivation is reported after 10 runs. We conduct significance testing using Wilcoxon Signed Rank Test [48], comparing the contrastive loss with other loss types. The p-value is averaged across datasets. A value below 0.05 denotes significant accuracy difference ( red ), while a value above 0.05 indicates insignificance ( green ).

| Method | Loss        | Cora         | CiteSeer     | PubMed       | Photo        | Computers    | Chameleon    | Squirrel     | Avg   | Avg p-value |
|--------|-------------|--------------|--------------|--------------|--------------|--------------|--------------|--------------|-------|-------------|
| DGI    | Contrast    | 83.38 ± 2.67 | 72.07 ± 2.37 | 84.77 ± 0.71 | 88.10 ± 1.81 | 83.35 ± 0.71 | 39.56 ± 2.86 | 34.55 ± 0.88 | 69.40 | -           |
|        | NO Training | 69.78 ± 3.39 | 55.15 ± 2.09 | 79.56 ± 1.35 | 69.08 ± 3.30 | 56.03 ± 1.97 | 31.44 ± 1.70 | 24.57 ± 1.22 | 55.09 | 0.0020      |
|        | NO Pos      | 66.84 ± 3.54 | 54.79 ± 3.33 | 78.25 ± 0.99 | 58.34 ± 3.92 | 71.98 ± 1.38 | 35.81 ± 2.34 | 26.99 ± 0.20 | 56.14 | 0.0020      |
|        | NO Neg      | 67.35 ± 4.61 | 58.17 ± 2.57 | 77.23 ± 1.05 | 62.75 ± 3.75 | 72.66 ± 1.48 | 31.62 ± 4.06 | 27.75 ± 1.85 | 56.79 | 0.0022      |
| MVGRL  | Contrast    | 84.41 ± 1.44 | 75.27 ± 0.79 | 85.62 ± 0.63 | 89.23 ± 1.52 | 79.58 ± 0.15 | 42.45 ± 2.43 | 33.97 ± 2.54 | 70.08 | -           |
|        | NO Training | 77.94 ± 2.23 | 58.92 ± 2.88 | 82.13 ± 0.63 | 81.15 ± 3.25 | 69.07 ± 0.40 | 32.23 ± 1.94 | 24.41 ± 1.10 | 60.84 | 0.0022      |
|        | NO Pos      | 75.44 ± 1.42 | 61.08 ± 2.48 | 81.26 ± 1.30 | 36.03 ± 1.57 | 38.36 ± 0.55 | 36.86 ± 2.56 | 29.98 ± 1.52 | 51.29 | 0.0020      |
|        | NO Neg      | 54.93 ± 4.67 | 35.03 ± 5.20 | 56.26 ± 1.91 | 36.47 ± 2.37 | 38.36 ± 0.56 | 29.34 ± 2.04 | 28.06 ± 1.66 | 39.78 | 0.0020      |

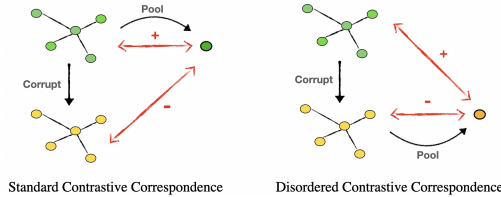

Figure 5: Illustration for disordering contrastive correspondence of views on DGI.

Table 12: Test accuracy (%) of DGI in standard contrastive correspondence (Std) and disordered correspondence (Dis).

| Method | Contrast | Cora         | CiteSeer     | PubMed       |
|--------|----------|--------------|--------------|--------------|
| DGI    | Std.     | 83.38 ± 2.68 | 72.07 ± 2.37 | 84.77 ± 0.71 |
|        | Dis.     | 83.35 ± 2.68 | 72.04 ± 2.17 | 84.70 ± 0.68 |

## 689 H Results of the Fine-tuning Protocol

690 In this section, we provide the fine-tuning protocol results of main experiments of our paper. Specifi-  
 691 cally, we add a linear classification head after the encoder. In the fine-tuning phase, we fine-tune the  
 692 whole networks according to downstream tasks, with the learning rate selected from [0.01, 0.001]  
 693 and the number of epochs selected from [100, 200, 500]. In Table 13 and Table 14, we report the  
 694 fine-tuning results for the node classification task with GRACE and DGI methods, and for the graph  
 695 classification tasks with GraphCL method, respectively. Sharing the same conclusion as the linear  
 696 probing protocol, only using negative samples achieves comparable performance as that using con-  
 697 trastive objectives. On the other hand, for the node classification task, only using positive samples

698 escapes severe collapse. We think the guidance of true labels in the fine-tuning helps the networks  
 699 relearn parameters and thus prevents collapse.

700 Furthermore, we report the fine-tuning results about augmentations in Table 15. For the default  
 701 augmentations (FM+PE), we set the ratio of each augmentation to 0.2 to save engineering effort. For  
 702 a fair comparison, the standard deviation  $\sigma$  of the random Gaussian noise is fixed to  $1e-4$ . Other  
 703 hyperparameters are the same across the three augmentation settings (FM+PE, Gaussian, and NO  
 704 Aug). As seen from the table, in the fine-tuning evaluation setting, random noise augmentation is on  
 705 average the best for each loss type. It further justifies our analysis that domain-agnostic augmentations  
 706 are enough for GCL.

Table 13: Fine-tuning accuracy (%) of node classification benchmarks using GCL methods. We compare the performances of models trained with InfoNCE loss (Contrast), uniformity loss (NO Pos), alignment loss (NO Neg), and no optimization objective (NO Training). Mean accuracy with standard derivation is reported after 10 runs. Average accuracy across datasets is reported. We conduct significance testing using Wilcoxon Signed Rank Test [48], comparing the contrastive loss and other loss types. The p-value is averaged across datasets. A value below 0.05 denotes significant accuracy difference ( red ), while a value above 0.05 denotes insignificance ( green ).

| Method | Loss     | Cora         | CiteSeer     | PubMed       | Photo        | Computers    | Chameleon    | Squirrel     | Avg   | Avg p-value |
|--------|----------|--------------|--------------|--------------|--------------|--------------|--------------|--------------|-------|-------------|
| GRACE  | Contrast | 85.15 ± 3.07 | 74.19 ± 3.66 | 84.64 ± 2.47 | 92.89 ± 0.56 | 88.92 ± 1.27 | 39.56 ± 3.76 | 33.13 ± 4.33 | 71.21 | -           |
|        | NO Pos   | 84.49 ± 3.50 | 74.07 ± 3.92 | 82.38 ± 2.36 | 92.84 ± 0.51 | 89.45 ± 1.14 | 38.60 ± 3.99 | 31.40 ± 3.76 | 70.46 | 0.3139      |
|        | NO Neg   | 81.62 ± 4.05 | 69.52 ± 4.46 | 83.87 ± 2.65 | 92.05 ± 0.89 | 89.07 ± 1.03 | 35.98 ± 5.13 | 30.48 ± 2.54 | 68.94 | 0.1398      |
| DGI    | Contrast | 85.66 ± 2.39 | 74.55 ± 1.68 | 85.69 ± 0.26 | 92.94 ± 0.88 | 90.03 ± 0.79 | 42.01 ± 6.07 | 32.74 ± 5.49 | 71.95 | -           |
|        | NO Pos   | 86.91 ± 2.16 | 74.79 ± 0.92 | 85.49 ± 0.25 | 92.73 ± 0.69 | 89.45 ± 0.65 | 42.01 ± 6.05 | 31.98 ± 5.73 | 71.91 | 0.4395      |
|        | NO Neg   | 85.00 ± 2.39 | 74.97 ± 1.08 | 85.44 ± 0.38 | 92.73 ± 0.67 | 90.13 ± 0.66 | 42.97 ± 6.52 | 32.13 ± 5.24 | 71.91 | 0.3672      |

Table 14: Fine-tuning accuracy (%) of graph classification benchmarks using GCL methods. We compare the performances of models trained with InfoNCE loss (Contrast), uniformity loss (NO Pos), alignment loss (NO Neg), and no optimization objective (NO Training). Mean accuracy with standard derivation is reported after 10 runs. Average accuracy across datasets is reported. We conduct significance testing using Wilcoxon Signed Rank Test [48], comparing the contrastive loss and other loss types. The p-value is averaged across datasets. A value below 0.05 denotes significant accuracy difference ( red ), while a value above 0.05 denotes insignificance ( green ).

| Method  | Loss     | MUTAG        | PTC-MR       | PROTEINS     | IMDB-BINARY  | IMDB-MULTI   | REDDIT-BINARY | Avg   | Avg p-value |
|---------|----------|--------------|--------------|--------------|--------------|--------------|---------------|-------|-------------|
| GraphCL | Contrast | 93.48 ± 2.52 | 80.64 ± 4.09 | 79.88 ± 0.43 | 64.53 ± 1.32 | 43.64 ± 0.63 | 79.67 ± 1.82  | 73.64 | -           |
|         | NO Pos   | 93.12 ± 0.74 | 80.45 ± 4.85 | 79.34 ± 3.10 | 63.13 ± 1.55 | 42.24 ± 0.31 | 76.73 ± 4.23  | 72.50 | 0.1966      |
|         | NO Neg   | 93.11 ± 1.14 | 80.36 ± 3.64 | 79.01 ± 3.69 | 62.37 ± 2.81 | 41.60 ± 0.47 | 76.75 ± 2.90  | 72.20 | 0.1400      |

Table 15: Fine-tuning accuracy (%) of node classification benchmarks using GRACE method with different augmentations under three loss settings. We compare no augmentations (NO Aug), domain-agnostic augmentations (Gaussian), and default domain-specific augmentations (FM+EP). Average accuracy and p-value are reported. We conduct significance testing using Wilcoxon Signed Rank Test [48], comparing the default augmentation with other settings. The p-value is averaged across datasets. A value below 0.05 denotes significant accuracy difference ( red ), while a value above 0.05 indicates insignificance ( green ).

| Loss     | Aug      | Cora         | CiteSeer     | PubMed       | Photo        | Computers    | Chameleon    | Squirrel     | Avg   | Avg p-value |
|----------|----------|--------------|--------------|--------------|--------------|--------------|--------------|--------------|-------|-------------|
| Contrast | FM+EP    | 85.15 ± 3.07 | 74.19 ± 3.66 | 84.64 ± 2.47 | 92.89 ± 0.56 | 88.92 ± 1.27 | 39.56 ± 3.76 | 33.13 ± 4.33 | 71.21 | -           |
|          | Gaussian | 86.69 ± 2.39 | 74.91 ± 2.98 | 84.52 ± 2.05 | 92.94 ± 1.02 | 88.94 ± 1.14 | 42.62 ± 6.55 | 31.55 ± 4.64 | 71.74 | 0.2829      |
|          | NO Aug   | 85.00 ± 3.20 | 74.07 ± 3.92 | 82.64 ± 2.69 | 93.10 ± 0.42 | 89.58 ± 1.20 | 37.03 ± 4.28 | 31.59 ± 4.49 | 70.43 | 0.2531      |
| NO Pos   | FM+EP    | 84.49 ± 3.50 | 74.07 ± 3.92 | 82.38 ± 2.36 | 92.84 ± 0.51 | 89.45 ± 1.14 | 38.60 ± 3.99 | 31.40 ± 3.76 | 70.46 | -           |
|          | Gaussian | 86.40 ± 2.84 | 74.67 ± 3.90 | 83.95 ± 1.72 | 92.73 ± 1.52 | 88.72 ± 1.18 | 40.79 ± 6.03 | 30.17 ± 4.73 | 71.06 | 0.2609      |
|          | NO Aug   | 85.00 ± 3.20 | 74.07 ± 3.92 | 82.42 ± 2.57 | 92.97 ± 0.58 | 89.49 ± 1.10 | 38.43 ± 3.88 | 31.59 ± 4.48 | 70.57 | 0.3859      |
| NO Neg   | FM+EP    | 81.62 ± 4.05 | 69.52 ± 4.46 | 83.87 ± 2.65 | 92.05 ± 0.89 | 89.07 ± 1.03 | 35.98 ± 5.13 | 30.48 ± 2.54 | 68.94 | -           |
|          | Gaussian | 84.26 ± 2.80 | 72.46 ± 4.75 | 84.49 ± 1.97 | 91.56 ± 1.75 | 88.37 ± 1.73 | 38.25 ± 2.54 | 28.25 ± 2.81 | 69.66 | 0.3273      |
|          | NO Aug   | 80.96 ± 5.24 | 71.38 ± 5.59 | 82.45 ± 2.69 | 92.03 ± 2.12 | 86.16 ± 5.95 | 33.97 ± 4.41 | 26.76 ± 2.49 | 67.67 | 0.2854      |



707 **I Extensive Experiments of ContraNorm in GCL methods**

708 In Table 5, we show that by simply incorporating the normalization layer into the encoder, the collapse  
 709 issue can be rooted out for the GRACE method. In this section, we incorporate ContraNorm into  
 710 multiple GCL methods under the no-negative setting. The results are shown in Table 16. It is obvious  
 711 that for these GCL methods, applying ContraNorm when there are no negative samples achieves  
 712 comparable performance with models trained with the contrastive loss (both positive and negative  
 713 samples). The extensive experiments validate the effectiveness of ContraNorm across different GCL  
 714 methods.

Table 16: Test accuracy (%) of node classification benchmarks using GCL methods. We compare the performances of models trained with InfoNCE loss (Contrast), alignment loss (NO Neg), and alignment loss with ContraNorm in encoders (GCN+CN). Mean accuracy with standard derivation is reported after 10 runs. Average accuracy across datasets is reported. We conduct significance testing using Wilcoxon Signed Rank Test [48], comparing the default setting (first line) with others. The p-value is averaged across datasets. A value below 0.05 denotes significant accuracy difference (red), while a value above 0.05 indicates insignificance (green). OOM denotes out of memory.

| Method | Loss     | Encoder  | Cora         | CiteSeer     | PubMed       | Photo        | Computers    | Avg   | Avg p-value |
|--------|----------|----------|--------------|--------------|--------------|--------------|--------------|-------|-------------|
| GRACE  | Contrast | GCN      | 84.67 ± 1.39 | 73.47 ± 2.32 | 85.80 ± 0.16 | 91.42 ± 1.27 | 89.01 ± 0.60 | 84.87 | -           |
|        | NO Neg   | GCN      | 29.85 ± 1.45 | 20.42 ± 2.26 | 39.63 ± 0.81 | 25.10 ± 1.74 | 36.84 ± 1.30 | 30.37 | 0.0020      |
|        | NO Neg   | GCN + CN | 82.35 ± 2.28 | 72.25 ± 1.86 | 83.30 ± 0.63 | 92.43 ± 0.82 | 84.48 ± 1.01 | 82.96 | 0.1520      |
| GCA    | Contrast | GCN      | 84.04 ± 1.55 | 72.63 ± 2.68 | 85.92 ± 0.69 | 93.07 ± 0.66 | 86.58 ± 0.75 | 84.45 | -           |
|        | NO Neg   | GCN      | 31.40 ± 3.61 | 22.16 ± 3.01 | 39.58 ± 0.83 | 28.13 ± 1.14 | 37.34 ± 0.95 | 31.72 | 0.0020      |
|        | NO Neg   | GCN + CN | 82.21 ± 1.29 | 72.87 ± 0.98 | 82.40 ± 0.78 | 92.47 ± 0.96 | 86.15 ± 0.58 | 83.22 | 0.2125      |
| ProGCL | Contrast | GCN      | 85.42 ± 3.41 | 72.85 ± 2.99 | OOM          | 93.81 ± 0.48 | 86.35 ± 1.28 | 84.61 | -           |
|        | NO Neg   | GCN      | 30.15 ± 2.70 | 21.08 ± 1.45 | 21.13 ± 1.20 | 4.88 ± 0.33  | 3.11 ± 0.65  | 16.07 | 0.0020      |
|        | NO Neg   | GCN + CN | 80.00 ± 1.75 | 73.35 ± 1.17 | 84.02 ± 0.91 | 93.59 ± 0.38 | 85.67 ± 0.43 | 83.33 | 0.2336      |

715 **J Gaussian Augmentations under Different Loss Settings**

716 In Section 6, we perform experiments using the GRACE method with different augmentations under  
 717 the InfoNCE loss. Here, we further report results under different losses in Table 17. For loss  
 718 without negative samples, the average performance gap between domain-specific augmentations and  
 719 noise augmentations is only 0.74%. When no augmentations, the performance drops 4.88%. We  
 720 conjecture that when no negative samples exist, the application of augmentations brings diversity in  
 721 representations, thus making collapse more difficult. For contrastive loss and loss without positive  
 722 samples, the gap between domain-specific augmentations and noise augmentations is also narrow.

Table 17: Test accuracy (%) of node classification benchmarks using GRACE method with different augmentations under three loss settings. We compare no augmentations (NO Aug), domain-agnostic augmentations (Gaussian), and default domain-specific augmentations (FM+EP). Average accuracy and p-value are reported. We conduct significance testing using Wilcoxon Signed Rank Test [48], comparing the default augmentation with other settings. The p-value is averaged across datasets. A value below 0.05 denotes significant accuracy difference (red), while a value above 0.05 indicates insignificance (green).

| Loss     | Encoder  | Aug      | Cora         | CiteSeer     | PubMed       | Photo        | Computers    | Avg   | Avg p-value |
|----------|----------|----------|--------------|--------------|--------------|--------------|--------------|-------|-------------|
| Contrast | GCN      | FM+EP    | 84.67 ± 1.39 | 73.47 ± 2.32 | 85.80 ± 0.16 | 91.42 ± 1.27 | 89.01 ± 0.60 | 84.87 | -           |
|          |          | Gaussian | 82.72 ± 2.38 | 72.60 ± 1.21 | 85.24 ± 0.61 | 91.32 ± 1.37 | 82.77 ± 1.09 | 82.93 | 0.1816      |
|          |          | NO Aug   | 79.56 ± 2.18 | 71.83 ± 1.83 | 84.68 ± 0.58 | 90.99 ± 1.26 | 82.83 ± 0.86 | 81.98 | 0.1008      |
| NO Pos   | GCN      | FM+EP    | 82.65 ± 1.18 | 73.50 ± 2.41 | 85.28 ± 0.79 | 91.32 ± 0.10 | 84.40 ± 0.43 | 83.43 | -           |
|          |          | Gaussian | 80.04 ± 1.93 | 70.84 ± 1.85 | 84.88 ± 0.89 | 91.33 ± 1.18 | 83.26 ± 1.24 | 82.07 | 0.1840      |
|          |          | NO Aug   | 79.37 ± 2.30 | 71.80 ± 1.84 | 84.69 ± 0.63 | 90.92 ± 1.21 | 82.49 ± 0.87 | 81.85 | 0.1176      |
| NO Neg   | GCN + CN | FM+EP    | 82.35 ± 2.28 | 72.25 ± 1.86 | 83.30 ± 0.63 | 92.43 ± 0.82 | 84.48 ± 1.01 | 82.96 | -           |
|          |          | Gaussian | 79.08 ± 2.47 | 72.43 ± 1.32 | 83.55 ± 0.22 | 91.59 ± 1.19 | 84.48 ± 1.07 | 82.23 | 0.2750      |
|          |          | NO Aug   | 75.59 ± 3.45 | 66.98 ± 3.40 | 82.14 ± 1.28 | 81.91 ± 1.42 | 83.79 ± 1.14 | 78.08 | 0.0688      |
